# Supplementary material for: Gene Expression, Single Nucleotide Variant and Fusion Transcript Discovery in Archival Material from Breast Tumors
Source: PLoS One. 2013 Nov 22;8(11):e81925. doi: 10.1371/journal.pone.0081925 (PMC3838386; doi:10.1371/journal.pone.0081925)
Supplement: Table S2 — Comparison of log2 fold change between TruSeq and RiboZeroGold ScriptSeq libraries from RNA isolated from fresh-frozen tumor identified 116 genes that were outliers in all nine patients. (XLSX) [file pone.0081925.s005.xlsx]

## Sheet: Table S2
Gene	Average Log2 Fold Change (TruSeq Froz/ScrSeq Froz)	Expression higher in
ADAM20	-3.6236	ScriptSeq library
ANGPTL3	-4.7705	ScriptSeq library
ANKRD36	-3.84378	ScriptSeq library
BRD7P3	-4.07769	ScriptSeq library
C10orf113	-4.49145	ScriptSeq library
C15orf5	-5.49242	ScriptSeq library
C1orf229	-8.06228	ScriptSeq library
C9orf131	-3.81124	ScriptSeq library
CCDC141	-3.61793	ScriptSeq library
CCDC7	-3.41011	ScriptSeq library
CDR1	-4.82232	ScriptSeq library
CFLAR-AS1	-3.20587	ScriptSeq library
FLJ42393	-5.15016	ScriptSeq library
GNRHR	-3.84082	ScriptSeq library
GPR22	-6.09613	ScriptSeq library
GPR52	-5.50676	ScriptSeq library
HIST1H1A	-6.26623	ScriptSeq library
HIST1H1B	-9.02205	ScriptSeq library
HIST1H1D	-8.54931	ScriptSeq library
HIST1H1E	-8.81593	ScriptSeq library
HIST1H2AB	-7.28672	ScriptSeq library
HIST1H2AG	-5.14712	ScriptSeq library
HIST1H2AH	-8.67611	ScriptSeq library
HIST1H2AJ	-6.99576	ScriptSeq library
HIST1H2AL	-6.64882	ScriptSeq library
HIST1H2AM	-6.88542	ScriptSeq library
HIST1H2BB	-7.60567	ScriptSeq library
HIST1H2BF	-6.50758	ScriptSeq library
HIST1H2BI	-7.44055	ScriptSeq library
HIST1H2BJ	-4.81571	ScriptSeq library
HIST1H2BL	-5.46687	ScriptSeq library
HIST1H2BM	-6.80717	ScriptSeq library
HIST1H3A	-6.00748	ScriptSeq library
HIST1H3B	-8.17783	ScriptSeq library
HIST1H3C	-8.17057	ScriptSeq library
HIST1H3F	-5.11239	ScriptSeq library
HIST1H3I	-8.04372	ScriptSeq library
HIST1H4B	-8.08153	ScriptSeq library
HIST1H4C	-7.74135	ScriptSeq library
HIST1H4E	-6.83318	ScriptSeq library
HIST1H4F	-6.72704	ScriptSeq library
HIST2H2AB	-8.21935	ScriptSeq library
HIST2H2AC	-7.46506	ScriptSeq library
KCTD4	-5.29298	ScriptSeq library
LOC100128590	-4.38555	ScriptSeq library
LOC100130880	-4.28211	ScriptSeq library
LOC100499194	-3.87818	ScriptSeq library
LOC100505658	-5.98299	ScriptSeq library
LOC100505795	-5.51899	ScriptSeq library
LOC100506134	-4.16128	ScriptSeq library
LOC146336	-5.83013	ScriptSeq library
LOC148696	-4.67789	ScriptSeq library
LOC285740	-5.36286	ScriptSeq library
LOC439950	-5.29218	ScriptSeq library
LOC644961	-3.45767	ScriptSeq library
MAB21L2	-5.06746	ScriptSeq library
MALAT1	-4.82176	ScriptSeq library
MIR15A	-4.10694	ScriptSeq library
MIR3609	-11.9781	ScriptSeq library
MIR548G	-3.88485	ScriptSeq library
MIRLET7F1	-4.36546	ScriptSeq library
NRSN1	-4.53199	ScriptSeq library
PAR5	-3.69761	ScriptSeq library
POU5F2	-4.45311	ScriptSeq library
PRH2	-3.94985	ScriptSeq library
RMRP	-10.1314	ScriptSeq library
RNU11	-6.52992	ScriptSeq library
RNU12	-7.5775	ScriptSeq library
RNU4ATAC	-4.60047	ScriptSeq library
RPPH1	-10.0716	ScriptSeq library
RPS16P5	-5.81352	ScriptSeq library
SCARNA10	-10.0802	ScriptSeq library
SCARNA11	-4.21767	ScriptSeq library
SCARNA12	-5.21789	ScriptSeq library
SCARNA17	-4.98418	ScriptSeq library
SCARNA2	-9.32703	ScriptSeq library
SCARNA21	-11.5965	ScriptSeq library
SCARNA4	-6.56247	ScriptSeq library
SCARNA5	-7.65375	ScriptSeq library
SCARNA6	-7.49362	ScriptSeq library
SCARNA7	-10.0902	ScriptSeq library
SCARNA8	-4.48531	ScriptSeq library
SCARNA9	-6.33645	ScriptSeq library
SND1-IT1	-5.32726	ScriptSeq library
SNORA14B	-5.2299	ScriptSeq library
SNORA19	-4.383	ScriptSeq library
SNORA20	-4.7814	ScriptSeq library
SNORA22	-6.1857	ScriptSeq library
SNORA23	-8.24502	ScriptSeq library
SNORA38	-5.15215	ScriptSeq library
SNORA70G	-4.57462	ScriptSeq library
SNORA74B	-5.62005	ScriptSeq library
SNORA7B	-4.51727	ScriptSeq library
SNORD17	-5.75718	ScriptSeq library
SNORD53	-4.14367	ScriptSeq library
SNORD71	-3.82026	ScriptSeq library
SNORD8	-6.39392	ScriptSeq library
TAS2R13	-6.57856	ScriptSeq library
TAS2R30	-5.57382	ScriptSeq library
TAS2R31	-4.32229	ScriptSeq library
TAS2R46	-4.34626	ScriptSeq library
TAS2R50	-4.20614	ScriptSeq library
TERC	-8.53655	ScriptSeq library
TMEM14E	-7.77793	ScriptSeq library
TMPRSS11D	-4.82561	ScriptSeq library
ZBTB20	-5.57599	ScriptSeq library
ZNF460	-5.14878	ScriptSeq library
TMEM134	4.28623	TruSeq library
PNPLA2	4.43356	TruSeq library
C11orf68	4.51034	TruSeq library
WFDC2	4.59101	TruSeq library
MFSD3	4.67711	TruSeq library
ATP6V0C	4.92185	TruSeq library
FLJ22184	5.35578	TruSeq library
RNF208	5.52194	TruSeq library
CTXN1	5.89743	TruSeq library
