# Supplementary material for: Gene Expression, Single Nucleotide Variant and Fusion Transcript Discovery in Archival Material from Breast Tumors
Source: PLoS One. 2013 Nov 22;8(11):e81925. doi: 10.1371/journal.pone.0081925 (PMC3838386; doi:10.1371/journal.pone.0081925)
Supplement: Table S5 — Transition/Transversion ratios, quality scores and coverage for single nucleotide variants in each library. (XLSX) [file pone.0081925.s008.xlsx]

## Sheet: Table S5
	Ti / Tv Ratio		Alternative Allele Coverage Statistics						Alternative Allele Quality
Sample_Name	Ti/Tv Ratio (Known SNVs)	Ti/Tv Ratio (Novel SNVs)	Min_AltAllele_Coverage	First_Quartile_AltAllele_Coverage	Median_AltAllele_Coverage	Mean_AltAllele_Coverage	Third_Quartile_AltAllele_Coverage	Max_AltAllele_Coverage	Min_AltAllele_Quality	First_Quartile_AltAllele_Quality	Median_AltAllele_Quality	Mean_AltAllele_Quality	Third_Quartile_AltAllele_Quality	Max_AltAllele_Quality
FFPE_ScriptSeq_BRB123	2.17	2.1	2	3	4	5.757	6	248	30.01	74.73	88.49	85.7	99	99
FFPE_ScriptSeq_BRB144	2.22	2.27	2	3	4	5.64	6	250	30.07	74.87	88.67	85.83	99	99
FFPE_ScriptSeq_BRB147	2.25	2.34	2	3	4	5.988	6	250	30.01	74.87	89.92	86.14	99	99
FFPE_ScriptSeq_BRB157	2.2	2.08	2	3	4	5.537	5	249	30.03	74.87	88.49	85.81	99	99
FFPE_ScriptSeq_BRB212	2.21	2.35	2	3	4	6.009	6	250	30	74.87	89.92	86.2	99	99
FFPE_ScriptSeq_BRB215	2.21	2.1	2	3	4	5.811	6	247	30.07	74.87	89.92	86.16	99	99
FFPE_ScriptSeq_BRB248	2.22	2.28	2	3	4	6.051	6	250	30.06	75.02	90.8	86.47	99	99
FFPE_ScriptSeq_BRB277	2.19	2.39	2	3	4	6.401	6	250	30.02	75.14	92.22	86.59	99	99
FFPE_ScriptSeq_MCJBCR028	2.2	2.12	2	3	4	4.893	5	248	30.01	76.5	89.92	86.65	99	99
FROZ_ScriptSeq_BRB123	2.1	1.74	2	4	5	8.489	9	250	30.01	78.76	99	89.16	99	99
FROZ_ScriptSeq_BRB144	2.12	1.77	2	3	5	7.453	8	250	30.05	77.88	99	88.35	99	99
FROZ_ScriptSeq_BRB147	2.27	2.14	2	4	6	9.302	10	250	30.03	79.47	99	89.48	99	99
FROZ_ScriptSeq_BRB157	2.21	2.05	3	4	5	9.075	10	250	30	79.46	99	89.4	99	99
FROZ_ScriptSeq_BRB212	2.16	1.82	2	4	5	8.028	8	250	30	77.89	99	88.7	99	99
FROZ_ScriptSeq_BRB215	2.18	1.88	2	4	5	8.508	9	250	30	78.13	99	88.92	99	99
FROZ_ScriptSeq_BRB248	2.06	1.52	2	3	4	6.892	7	250	30.06	77.27	99	87.93	99	99
FROZ_ScriptSeq_BRB277	2.13	1.67	3	4	5	8.052	8	250	30.01	77.88	99	88.76	99	99
FROZ_ScriptSeq_MCJBCR028	2.14	1.72	2	4	5	7.999	8	250	30.07	77.88	99	88.56	99	99
FROZ_TruSeq_BRB123	2.44	1.85	2	7	12	21.44	23	250	30.05	72.24	99	84.54	99	99
FROZ_TruSeq_BRB144	2.41	1.72	2	7	12	22.55	24	250	30.01	72.23	99	84.62	99	99
FROZ_TruSeq_BRB147	2.51	2.39	3	8	13	24.89	27	250	30	81.69	99	86.9	99	99
FROZ_TruSeq_BRB157	2.47	2.2	3	8	13	24.85	26	250	30.06	78.31	99	86.24	99	99
FROZ_TruSeq_BRB212	2.43	2.1	3	7	12	22.91	23	250	30	74.36	99	85.02	99	99
FROZ_TruSeq_BRB215	2.5	1.61	2	5	11	19.58	21	250	30.06	71.37	99	84.2	99	99
FROZ_TruSeq_BRB248	2.42	1.85	2	6	12	21.84	23	250	30	72.23	99	84.55	99	99
FROZ_TruSeq_BRB277	2.41	1.51	3	4	10	20.22	21	250	30.07	69.65	99	83.31	99	99
FROZ_TruSeq_MCJBCR028	2.4	1.95	2	6	12	19.68	21	250	30.06	70.36	99	83.98	99	99
